# Supplementary material for: A novel lncRNA, LL22NC03-N64E9.1, represses KLF2 transcription through binding with EZH2 in colorectal cancer
Source: PubMed Central journal article supplement (PMC5601744; doi:10.18632/oncotarget.19738), 2017-07-31
Supplement: oncotarget-08-59435-s001.pdf [file oncotarget-08-59435-s001.pdf]

## A novel lncRNA, LL22NC03-N64E9.1, represses KLF2 transcription through binding with EZH2 in colorectal cancer

### SUPPLEMENTARY MATERIALS

Supplementary Table 1: Sequences of primers for qPCR and siRNA sequence

| Primers for qRT-PCR                   | Sequences (5' to 3')     |
|---------------------------------------|--------------------------|
| LL22NC03-N64E9.1 (Forward)            | AAGCCATGTAAAGGGGGCTC     |
| LL22NC03-N64E9.1 (Reverse)            | TGGTAGTCTGACCATTCTGCAT   |
| GAPDH (Forward)                       | GAAGAGAGAGACCCTCACGCTG   |
| GAPDH (Reverse)                       | ACTGTGAGGAGGGGAGATTCAGT  |
| KLF2 (Forward)                        | CTGCACATGAAACGGCACAT     |
| KLF2 (Reverse)                        | CAGTCACAGTTTGGGAGGGG     |
| P15 (Forward)                         | GGACTAGTGGAGAAGGTGCG     |
| P15 (Reverse)                         | GGGCGCTGCCCATCATCATG     |
| LSD1 (Forward)                        | AGCGTCATGGTCTTATCAA      |
| LSD1 (Reverse)                        | GAAATGTGGCAACTCGTC       |
| EZH2 (Forward)                        | TGCACATCCTGACTTCTGTG     |
| EZH2 (Reverse)                        | AAGGGCATTACCAACTCC       |
| P21 (Forward)                         | AAGTCAGTTCCTTGTGGAGCC    |
| P21 (Reverse)                         | GGTTCTGACGGACATCCCCA     |
| PTEN (Forward)                        | TGGATTCTGACTTAGACTTGACCT |
| PTEN (Reverse)                        | GGTGGGTTATGGTCTTCAAAGG   |
| <b>Interference sequences (siRNA)</b> |                          |
| siRNA 1# (LL22NC03-N64E9.1)           | UAGCUGGAGCAGUACAUCUCAAUU |
| siRNA 2# (LL22NC03-N64E9.1)           | AAGUAAUCAAGUCCUGCUUUCUUG |
| shRNA-LL22NC03-N64E9.1                | TCTCAACATCTCTTCTTAATT    |
| si-NC                                 | UUCUCCGAACGUGUCACGUTT    |
| si-EZH2                               | GAGGUUCAGACGAGCUGAUUU    |
